# Supplementary material
Source: Research Square preprint supplement (doi:10.21203/rs.3.rs-9628301/v1)

OsNAC1

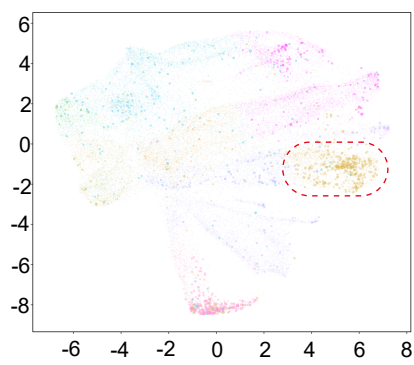

OsNAC10

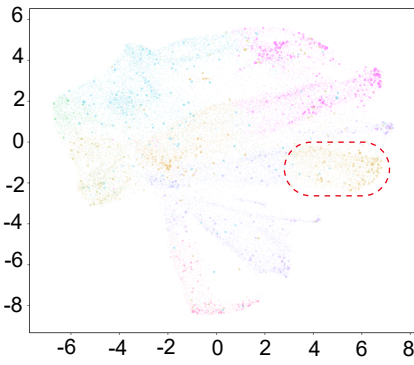

OsNAC15

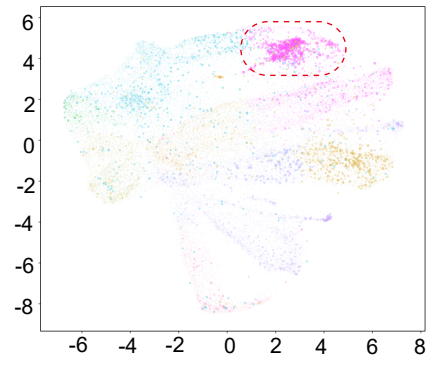

- Cortex
- Endodermis
- Epidermis
- Epidermis near root hair
- Exodermis
- Meristem
- Root cap
- Sclerenchyma
- Vascular

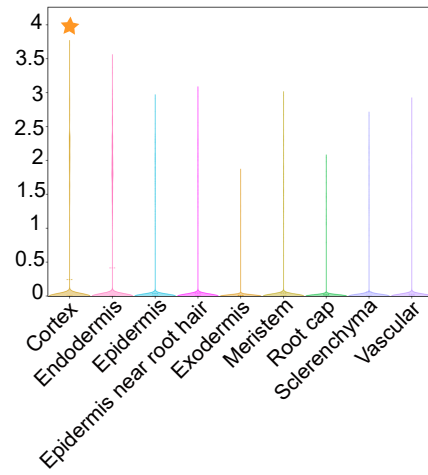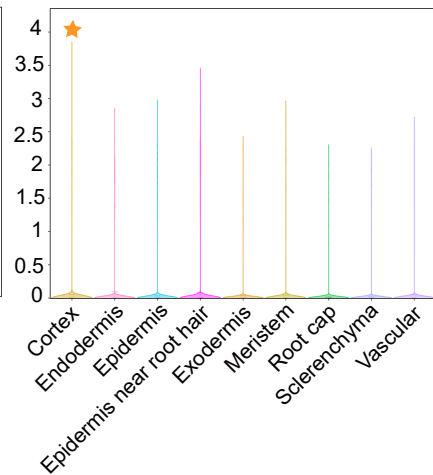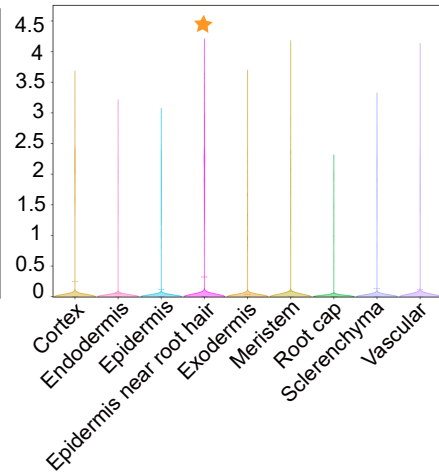

Supplement: Supplementary file 6 [file Figure S6.pdf › figure S/Figure S6.pdf]
