# Supplementary material
Source: Research Square preprint supplement (doi:10.21203/rs.3.rs-9628301/v1)

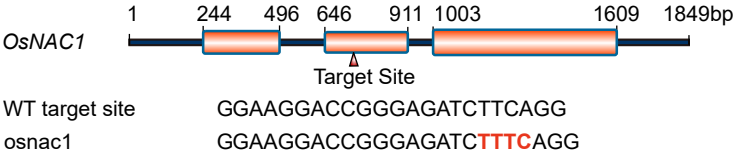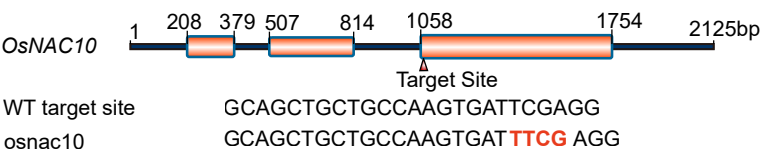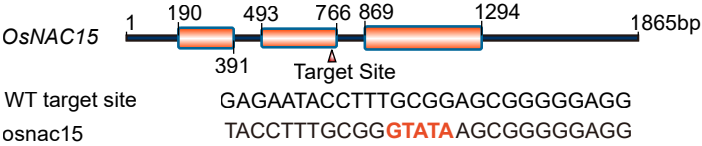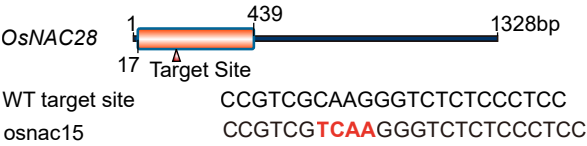

Supplement: Supplementary file 1 [file Figure S1.pdf › figure S/Figure S1.pdf]

Genes in Profile

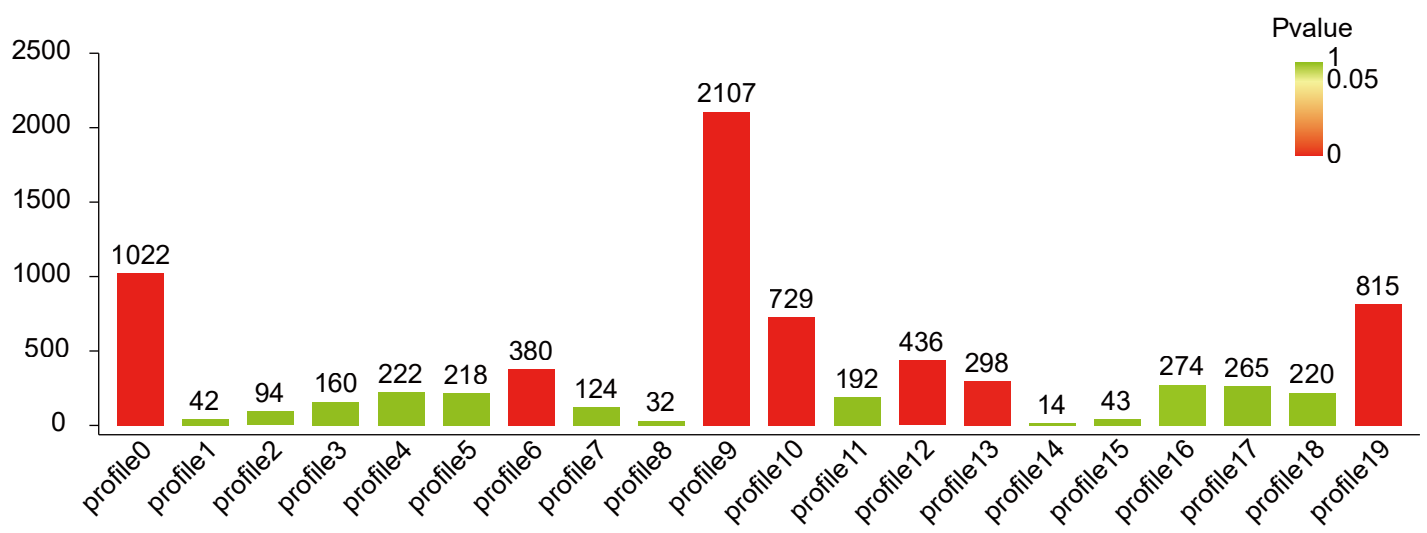

Supplement: Supplementary file 2 [file Figure S2.pdf › figure S/Figure S2.pdf]

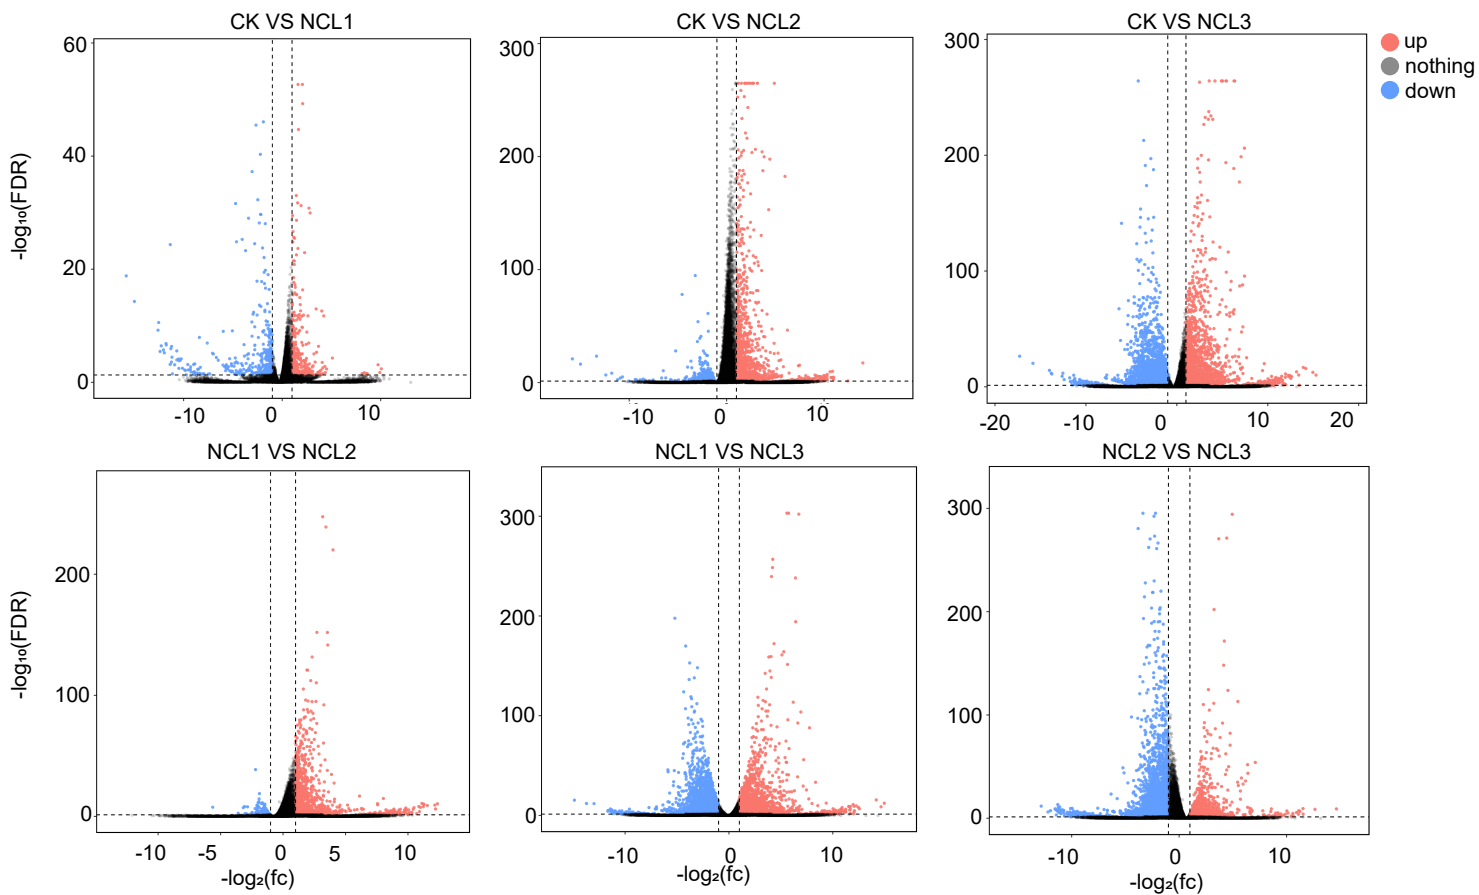

Supplement: Supplementary file 3 [file Figure S3.pdf › figure S/Figure S3.pdf]

A

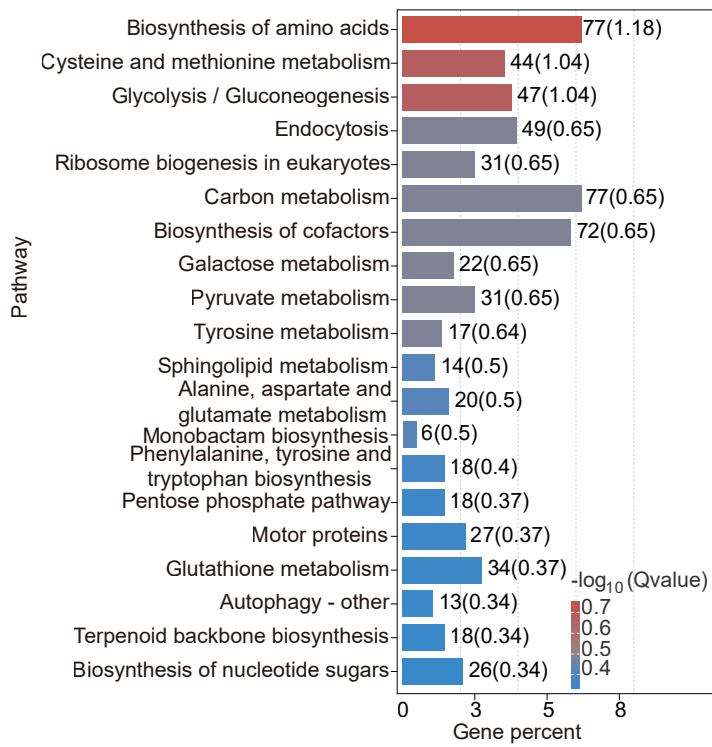

B

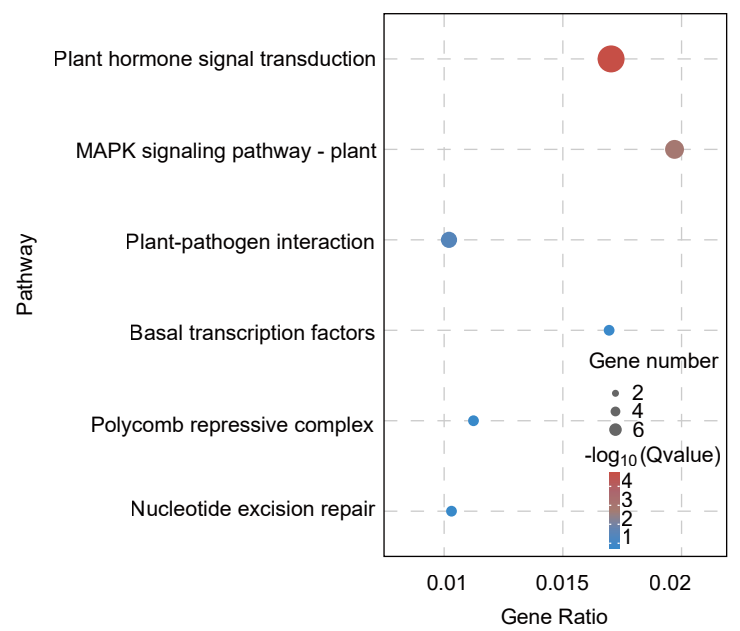

Supplement: Supplementary file 4 [file Figure S4.pdf › figure S/Figure S4.pdf]

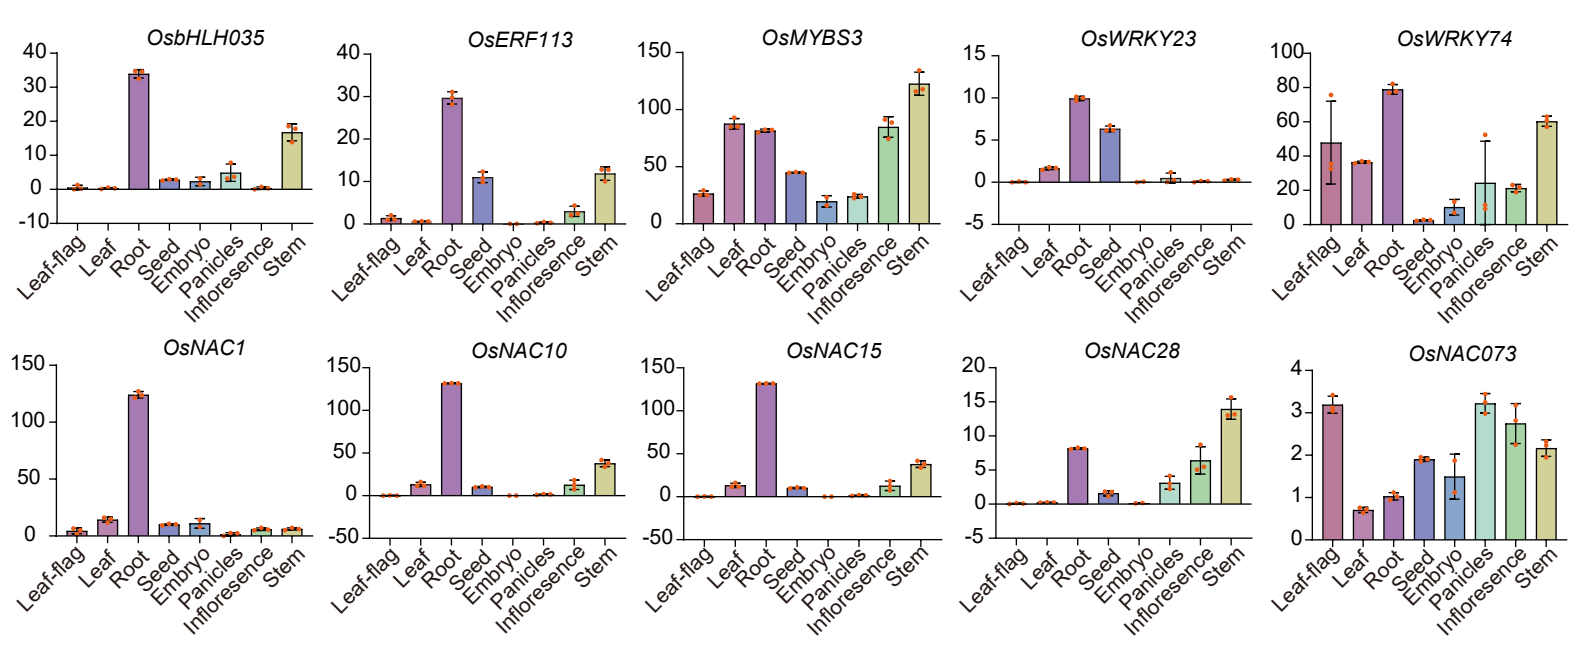

Supplement: Supplementary file 5 [file Figure S5.pdf › figure S/Figure S5.pdf]
